# Supplementary material for: Sugar phosphate activation of the stress sensor eIF2B
Source: PubMed Central journal article supplement (PMC8187479; doi:10.1038/s41467-021-23836-z), 2021-06-08
Supplement: 41467_2021_23836_MOESM1_ESM.pdf [file 41467_2021_23836_MOESM1_ESM.pdf]

## SUPPLEMENTARY INFORMATION

### Sugar phosphate activation of the stress sensor eIF2B

Qi Hao<sup>1</sup>, Jin-Mi Heo<sup>1,2</sup>, Boguslaw P. Nocek<sup>3</sup>, Kevin G. Hicks<sup>4</sup>, Vincent S. Stoll<sup>3</sup>, Clint Remarcik<sup>1</sup>,  
Sean Hackett<sup>1</sup>, Lauren LeBon<sup>1</sup>, Rinku Jain<sup>3</sup>, Dan Eaton<sup>1</sup>, Jared Rutter<sup>4,5</sup>, Yao Liang Wong<sup>1\*</sup>,  
Carmela Sidrauski<sup>1\*</sup>

<sup>1</sup> Calico Life Sciences LLC, South San Francisco, CA, USA

<sup>2</sup> Present address: Loxo Oncology at Lilly, South San Francisco, CA, USA

<sup>3</sup> Research & Development, AbbVie, 1 North Waukegan Road, North Chicago, IL, USA

<sup>4</sup> Department of Biochemistry, University of Utah School of Medicine, Salt Lake City, UT, USA

<sup>5</sup> Howard Hughes Medical Institute, University of Utah School of Medicine, Salt Lake City, UT, USA

These authors contributed equally: Qi Hao and Jin-Mi Heo

These authors jointly supervised this work: Yao Liang Wong and Carmela Sidrauski

\* Correspondence: [yao@calicolabs.com](mailto:yao@calicolabs.com), [carmela@calicolabs.com](mailto:carmela@calicolabs.com)

## CONTENTS

Supplementary Figures 1-11.

Supplementary Tables 1-2.

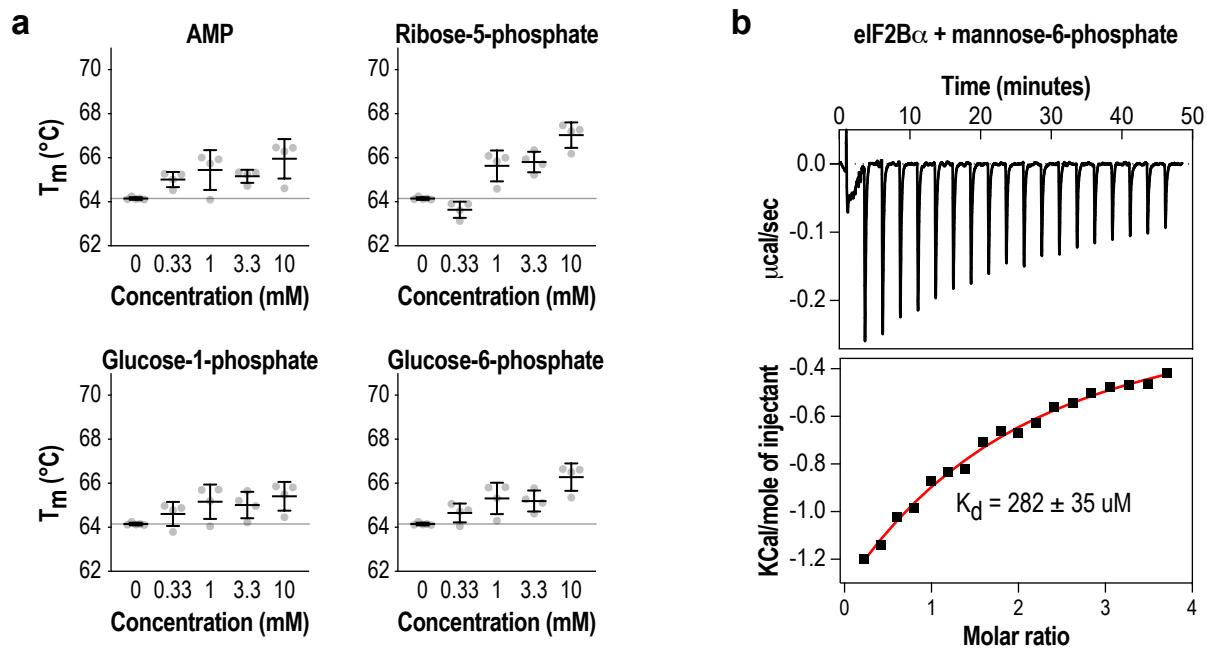

Supplementary Figure 1. **Interactions of eIF2B $\alpha$  with sugar phosphates.** **a** Differential scanning fluorimetry of eIF2B $\alpha$  in combination with selected metabolites in dose-response. Metabolite binding increased the  $T_m$  of eIF2B $\alpha$ . Bars are mean  $\pm$  standard deviation of  $n=4$  independent experiments. **b**  $K_d$  of the eIF2B $\alpha$ -M6P interaction measured by ITC. The upper subpanel shows the baseline-subtracted thermogram. The bottom subpanel represents the binding isotherm, with the red line indicating the fit curve.

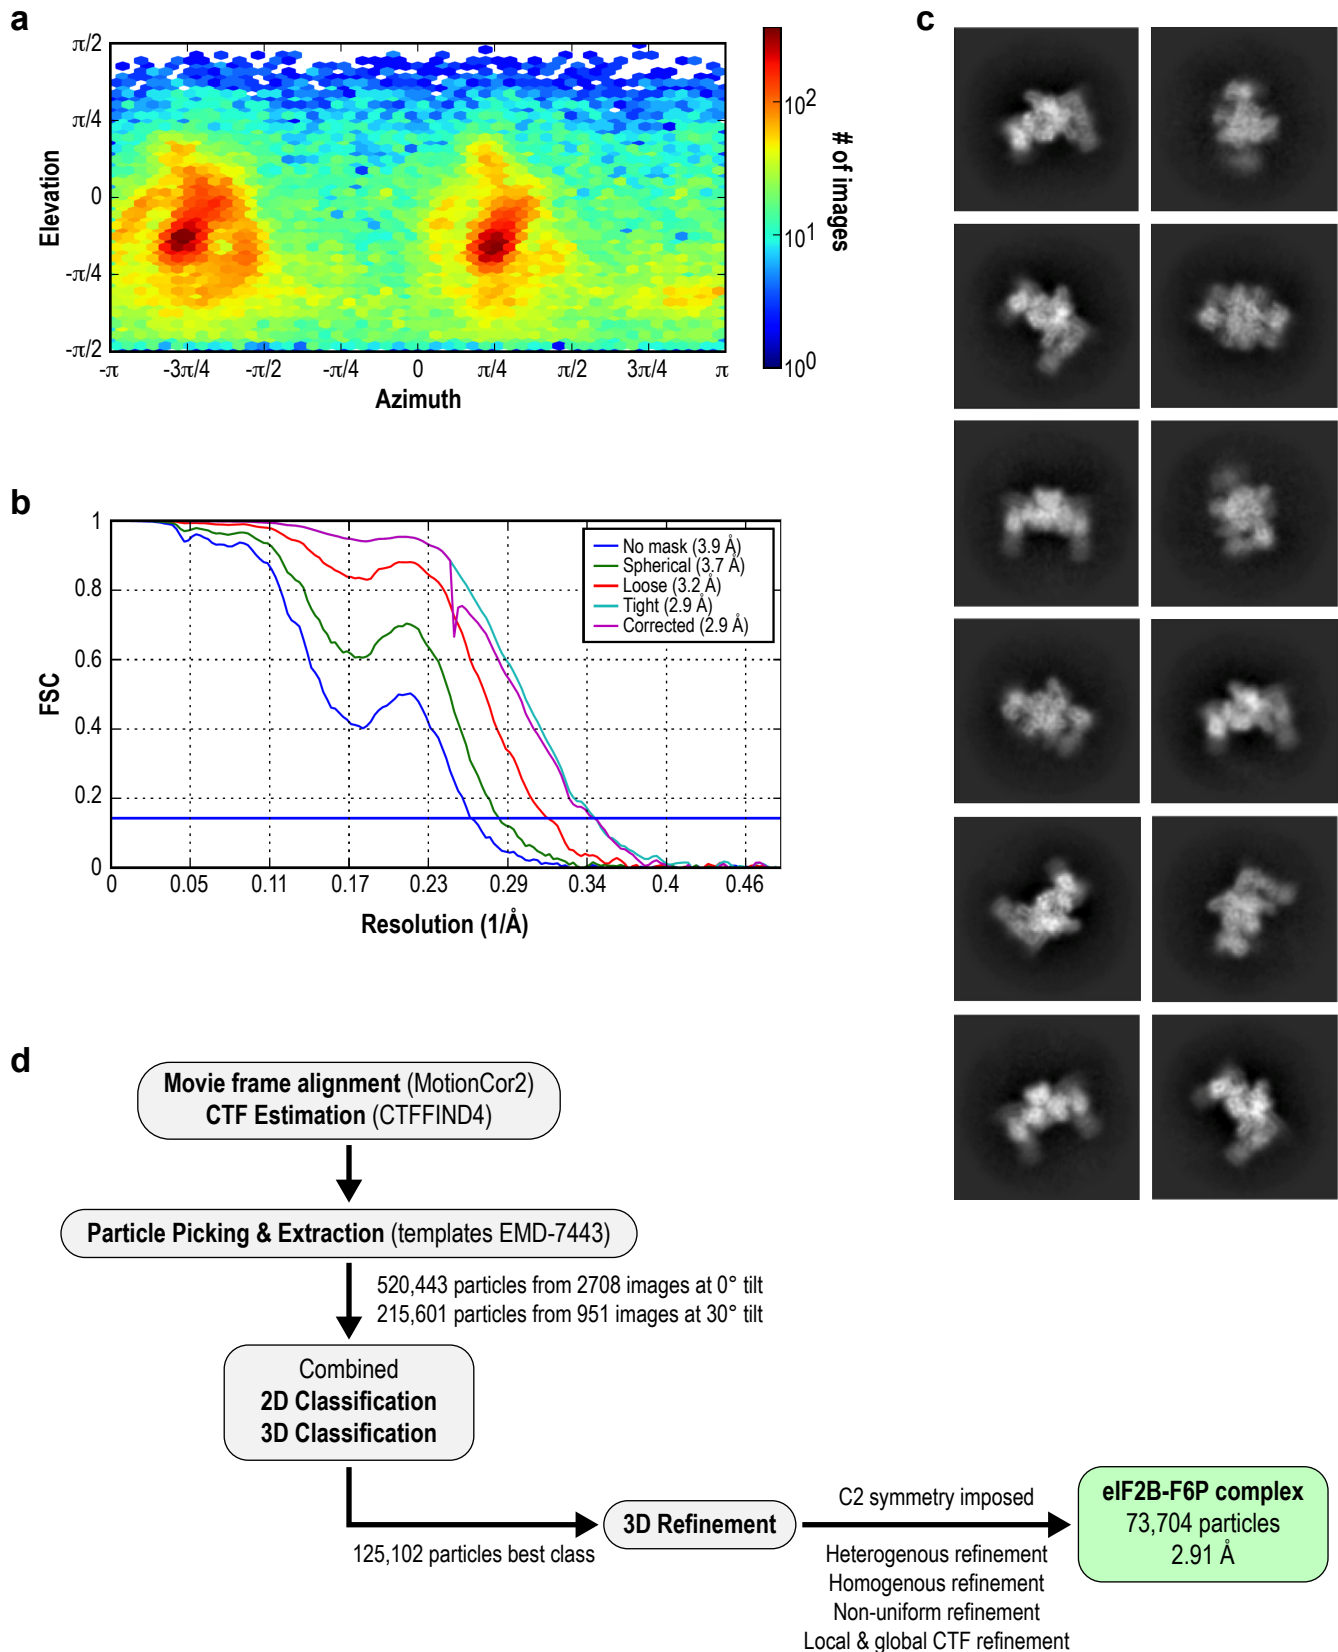

Supplementary Fig. 2. **Structure and resolution determination of eIF2B-F6P.** **a** Per-particle distribution over azimuth and elevation angles using cryoSPARC v2. **b** Gold-standard Fourier shell correlations for the final density map, with a resolution of 2.9 Å. **c** Samples of 736,044 particle images selected by template matching after 2D classification, acquired at different orientations and 0° or 30° tilt. **d** Flowchart summary of cryo-EM processing steps from frame alignment to 3D reconstruction. C2 symmetry was imposed during homogenous refinement after two rounds of 3D classification and at all subsequent refinement steps.

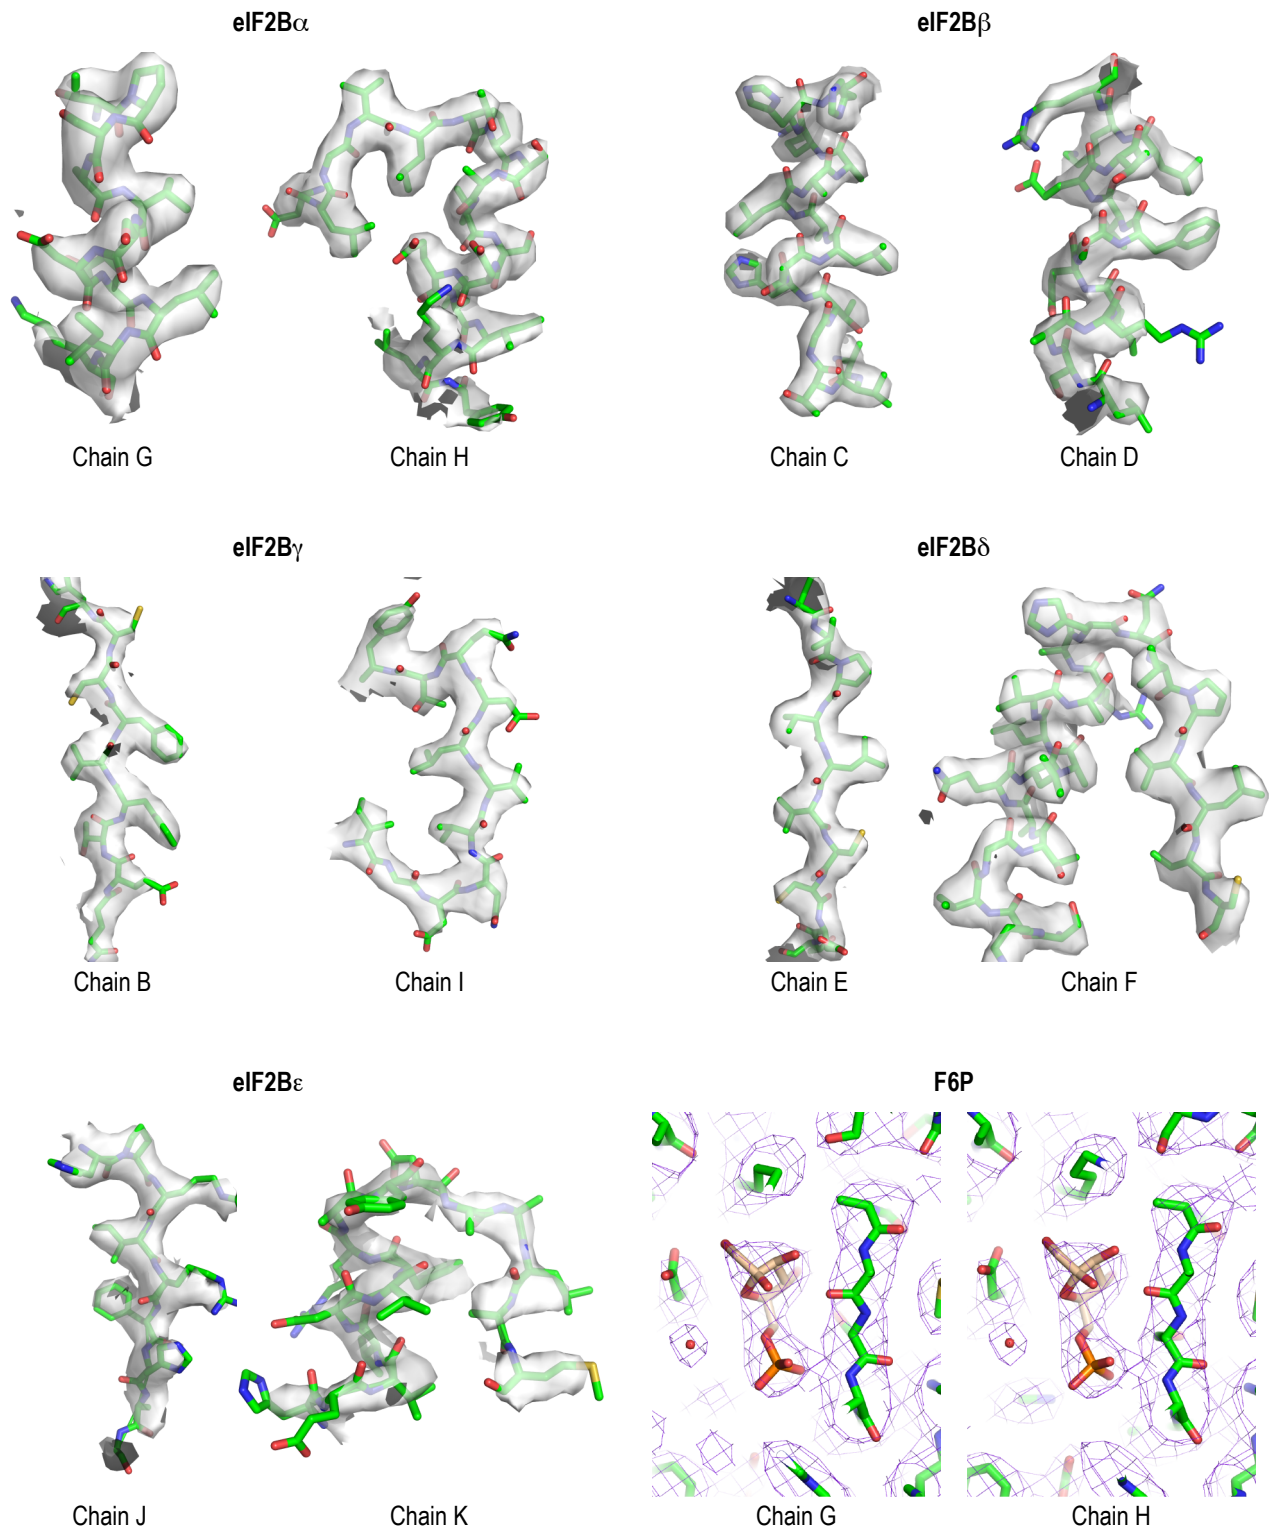

Supplementary Figure 3. **Cryo-EM density maps for selected regions of eIF2B.** Cryo-EM density is depicted by the gray surface and the atomic model as green sticks. Density for F6P bound to the eIF2B $\alpha$  subunits is shown in the bottom right. Density for the two eIF2B $\epsilon$  subunits is significantly lower resolution than the overall value of 2.9 Å. Cryo-EM density for F6P and neighboring amino acids is well-resolved, allowing placement of a few solvent molecules (red spheres).



**a**

**Sugar coordination Phosphate coordination**

|                          |     |          |              |   |                 |       |                 |     |             |                |                |     |    |     |   |   |   |   |   |   |   |   |   |   |   |   |   |   |   |   |   |   |   |   |   |   |   |   |   |   |   |     |   |   |   |     |     |     |   |   |   |     |     |   |   |   |     |
|--------------------------|-----|----------|--------------|---|-----------------|-------|-----------------|-----|-------------|----------------|----------------|-----|----|-----|---|---|---|---|---|---|---|---|---|---|---|---|---|---|---|---|---|---|---|---|---|---|---|---|---|---|---|-----|---|---|---|-----|-----|-----|---|---|---|-----|-----|---|---|---|-----|
| <i>Tk</i> RBPI           | 131 | THCHSKAA | -----        | I | SVMKTAWEQKDK    | I     | KVIVTETRPKWQG   | -   | KITAKELASYG | I              | PV             | 179 |    |     |   |   |   |   |   |   |   |   |   |   |   |   |   |   |   |   |   |   |   |   |   |   |   |   |   |   |   |     |   |   |   |     |     |     |   |   |   |     |     |   |   |   |     |
| <i>Hs</i> MTNA           | 166 | THCNTG   | LATAGYGTALGV | I | RSLHSLGRLEHAFCT | E     | TRPYNQGARL      | T   | AFELVYEQ    | I              | PA             | 223 |    |     |   |   |   |   |   |   |   |   |   |   |   |   |   |   |   |   |   |   |   |   |   |   |   |   |   |   |   |     |   |   |   |     |     |     |   |   |   |     |     |   |   |   |     |
| <i>Sc</i> eIF2B $\alpha$ | 128 | VHGYSR   | AV-----      | F | SLLNHAANKF      | I     | RFRCVVTESRPSKQG | -   | NQLYTLLEQKG | I              | PV             | 176 |    |     |   |   |   |   |   |   |   |   |   |   |   |   |   |   |   |   |   |   |   |   |   |   |   |   |   |   |   |     |   |   |   |     |     |     |   |   |   |     |     |   |   |   |     |
| <i>Hs</i> eIF2B $\alpha$ | 127 | THAYS    | SRVV-----    | L | RVL EAAVAKKRF   | S     | VYVTE           | S   | QPDLSG      | -              | KKMAKALCHLNVPV | 175 |    |     |   |   |   |   |   |   |   |   |   |   |   |   |   |   |   |   |   |   |   |   |   |   |   |   |   |   |   |     |   |   |   |     |     |     |   |   |   |     |     |   |   |   |     |
| <i>Hs</i> eIF2B $\beta$  | 167 | TIGFS    | SRTV-----    | E | AFLKEA          | -     | ARKRKFHV        | I   | VAECAPFCQG  | -              | HEMAVNLSKAG    | I   | ET | 214 |   |   |   |   |   |   |   |   |   |   |   |   |   |   |   |   |   |   |   |   |   |   |   |   |   |   |   |     |   |   |   |     |     |     |   |   |   |     |     |   |   |   |     |
| <i>Hs</i> eIF2B $\delta$ | 335 | VYGCSS   | LV-----      | S | RILQEAWTEGRR    | F     | RVVVDSRPWLE     | G   | -           | RHTLRSLVHAGVPA | 383            |     |    |     |   |   |   |   |   |   |   |   |   |   |   |   |   |   |   |   |   |   |   |   |   |   |   |   |   |   |   |     |   |   |   |     |     |     |   |   |   |     |     |   |   |   |     |
|                          |     |          |              |   |                 |       |                 |     |             |                |                |     |    |     |   |   |   |   |   |   |   |   |   |   |   |   |   |   |   |   |   |   |   |   |   |   |   |   |   |   |   |     |   |   |   |     |     |     |   |   |   |     |     |   |   |   |     |
| <i>Tk</i> RBPI           | 180 | IYVVD    | SAARHYMKM    | - | -               | TDKVV | M               | GAD | S           | I              | T              | V   | N  | G   | A | V | I | N | K | I | G | T | A | L | I | A | L | T | A | K | E | H | R | V | W | T | M | I | A | A | E | 235 |   |   |   |     |     |     |   |   |   |     |     |   |   |   |     |
| <i>Hs</i> MTNA           | 224 | TLITD    | SMVAAAMAH    | R | G               | V     | S               | A   | V           | V              | V              | G   | A  | D   | R | V | V | A | N | G | D | T | A | N | K | V | G | T | Y | Q | L | A | I | V | A | K | H | H | G | I | P | F   | Y | V | A | A   | P   | 281 |   |   |   |     |     |   |   |   |     |
| <i>Sc</i> eIF2B $\alpha$ | 177 | TLIVD    | SAVGAVIDK    | - | -               | V     | D               | K   | V           | F              | V              | G   | A  | E   | G | V | A | E | S | G | G | I | I | N | L | V | G | T | Y | S | V | G | V | L | A | H | N | A | R | K | P | F   | Y | V | V | T   | E   | 232 |   |   |   |     |     |   |   |   |     |
| <i>Hs</i> eIF2B $\alpha$ | 176 | TVVLD    | AAVGYIMEK    | - | -               | A     | D               | L   | V           | I              | V              | G   | A  | E   | G | V | V | E | N | G | G | I | I | N | K | I | G | T | N | Q | M | A | V | C | A | K | A | Q | N | K | P | F   | Y | V | V | A   | E   | 231 |   |   |   |     |     |   |   |   |     |
| <i>Hs</i> eIF2B $\beta$  | 215 | TVMTD    | AAIFAVMSR    | - | -               | V     | N               | K   | V           | I              | I              | G   | T  | K   | T | I | L | A | N | G | A | L | R | A | V | T | G | H | T | L | L | A | A | K | H | H | S | T | P | L | I | V   | C | A | P | 270 |     |     |   |   |   |     |     |   |   |   |     |
| <i>Hs</i> eIF2B $\delta$ | 384 | SYLLI    | PAASYVLP     | E | -               | -     | V               | S   | K           | V              | L              | L   | G  | A   | H | A | L | L | A | N | G | S | V | M | S | R | V | G | T | A | Q | L | A | L | V | A | R | A | H | N | V | P   | V | L | V | C   | E   | 439 |   |   |   |     |     |   |   |   |     |
|                          |     |          |              |   |                 |       |                 |     |             |                |                |     |    |     |   |   |   |   |   |   |   |   |   |   |   |   |   |   |   |   |   |   |   |   |   |   |   |   |   |   |   |     |   |   |   |     |     |     |   |   |   |     |     |   |   |   |     |
| <i>Tk</i> RBPI           | 236 | TYK      | FHPETMLGQL   | V | E               | I     | E               | M   | R           | D              | P              | T   | E  | V   | I | P | E | D | E | - | - | - | L | K | T | W | P | K | N | - | - | I | E | V | W | N | P | A | F | D | V | T   | P | P | E | Y   | 287 |     |   |   |   |     |     |   |   |   |     |
| <i>Hs</i> MTNA           | 282 | SS       | CDLRL        | E | T               | G     | K               | E   | I           | I              | E              | E   | R  | P   | G | Q | E | L | T | D | V | N | G | - | - | - | V | R | I | A | A | P | G | - | - | I | G | V | W | N | P | A   | F | D | V | T   | P   | H   | D | L | I | 333 |     |   |   |   |     |
| <i>Sc</i> eIF2B $\alpha$ | 233 | SHK      | FVRM         | F | P               | L     | S               | S   | D           | D              | L              | P   | M  | A   | G | P | P | L | D | F | T | R | R | T | D | D | - | - | L | E | D | A | L | R | G | - | - | - | - | - | - | P   | T | I | D | Y   | T   | A   | Q | E | Y | I   | 280 |   |   |   |     |
| <i>Hs</i> eIF2B $\alpha$ | 232 | SFK      | FVRL         | F | P               | L     | N               | Q   | Q           | D              | V              | -   | -  | -   | - | P | D | K | F | K | Y | K | A | D | T | - | - | - | L | K | V | A | Q | T | G | Q | D | L | K | E | E | H   | P | W | D | Y   | T   | A   | P | S | L | I   | 281 |   |   |   |     |
| <i>Hs</i> eIF2B $\beta$  | 271 | MFKL     | SPQF         | P | N               | E     | E               | S   | F           | H              | K              | F   | V  | A   | P | E | E | V | L | P | F | T | E | G | D | I | L | E | K | V | S | V | H | C | - | - | - | - | - | - | P | V   | F | D | Y | V   | P   | P   | E | L | I | 321 |     |   |   |   |     |
| <i>Hs</i> eIF2B $\delta$ | 440 | TYK      | F            | C | E               | R     | V               | Q   | T           | D              | A              | F   | V  | S   | N | E | L | D | D | P | D | D | L | Q | C | R | G | E | H | V | A | L | A | N | W | Q | N | H | A | S | L | R   | L | L | N | L   | V   | Y   | D | V | T | P   | P   | E | L | V | 497 |

**b**

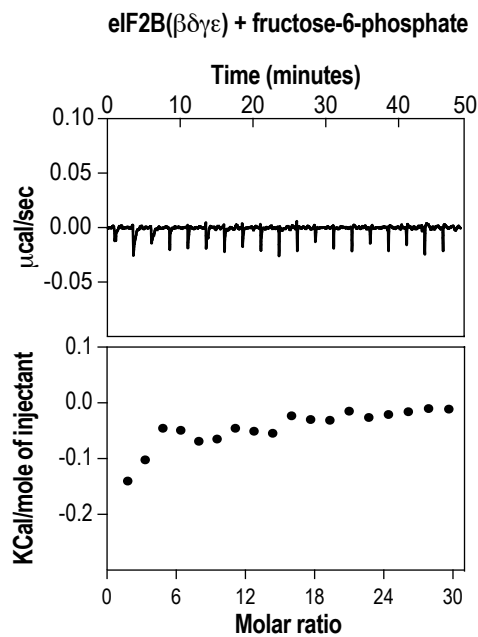

**c**

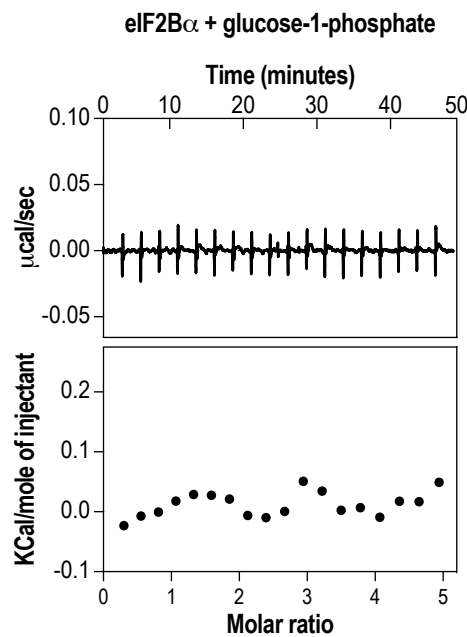

Supplementary Figure 4. **Sequence alignment of eIF2B $\alpha$  and its homologs supports the structural model of residues critical for metabolite binding.** **a** Protein sequences of human eIF2B $\alpha$ , eIF2B $\beta$  and eIF2B $\delta$  were aligned with human methylthioribose-1-phosphate isomerase (MTNA), *T. kodakarensis* ribose-1,5-bisphosphate isomerase (RBPI) and *S. cerevisiae* eIF2B $\alpha$  using MUSCLE. Only the region immediately encompassing the eIF2B $\alpha$  ligand-binding pocket is shown. Sugar-coordinating and phosphate-coordinating residues based on the eIF2B-F6P structure are indicated in green and orange, respectively. **b** eIF2B( $\beta\delta\gamma\epsilon$ ) does not interact with F6P, as measured by ITC. **c** eIF2B $\alpha$  does not interact with G1P, as measured by ITC. In **b** and **c**, the upper subpanel shows the baseline-subtracted thermogram. The bottom subpanel represents the binding isotherm. No curves were fit due to lack of detectable binding.

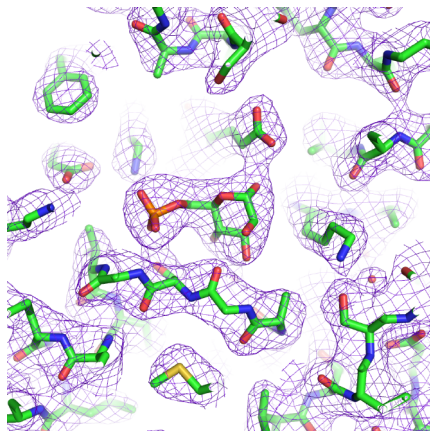

Chain A

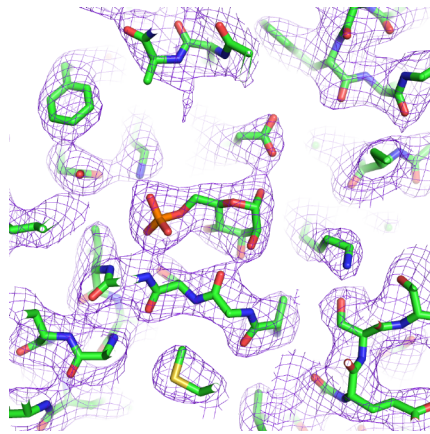

Chain B

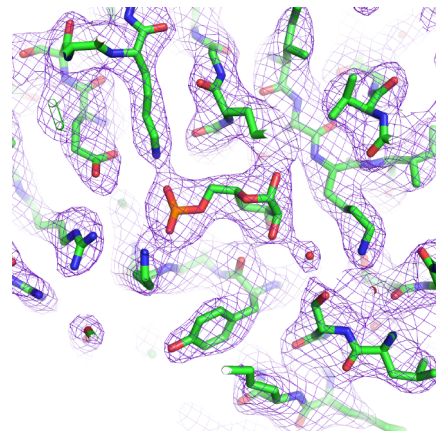

Chain C

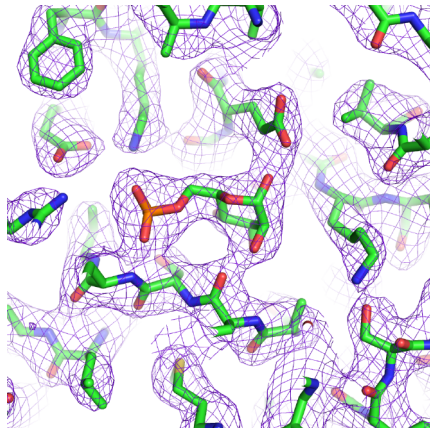

Chain D

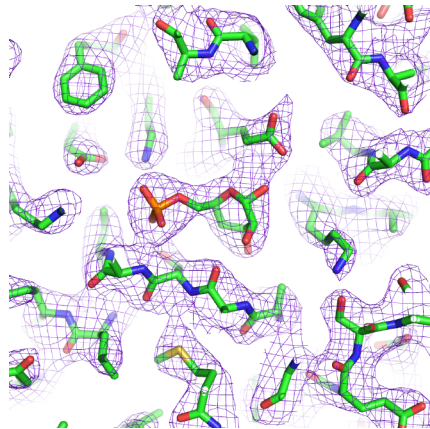

Chain E

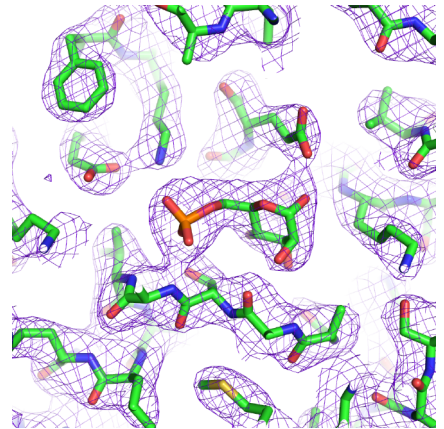

Chain F

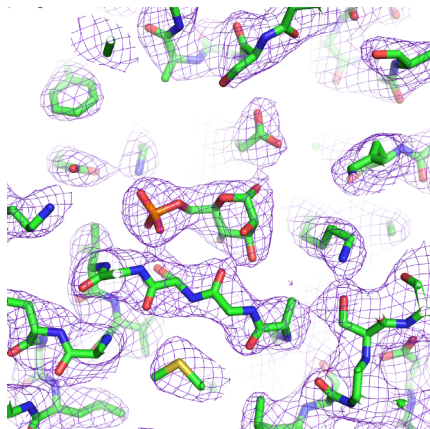

Chain G

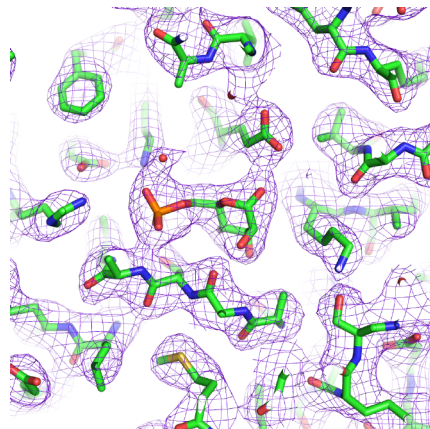

Chain H

Supplementary Figure 5. **2Fo-Fc density for M6P bound to eIF2B $\alpha$ .** Density is shown at  $1\sigma$  (purple mesh) for all chains in the asymmetric unit of the unit cell.

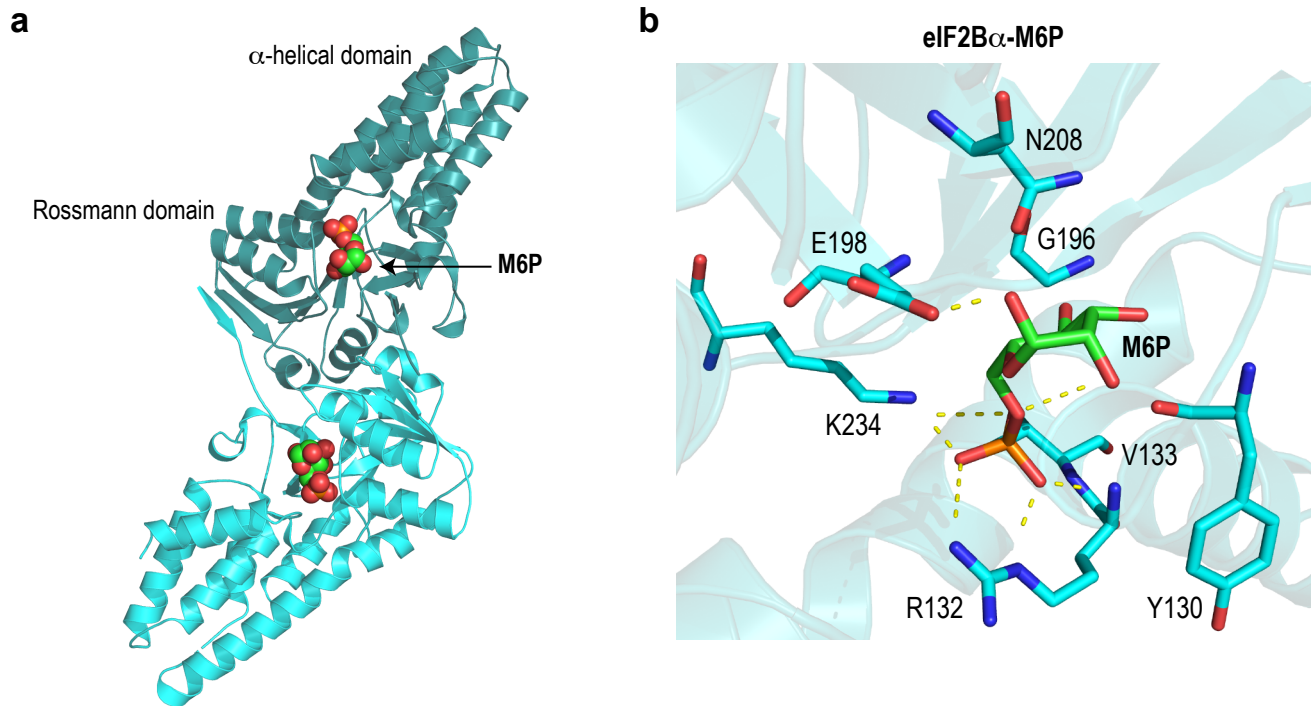

Supplementary Figure 6. **2.7 Å X-ray crystal structure of eIF2B $\alpha$  in complex with M6P (PDB 7MKA).** **a** Overall structure of the eIF2B $\alpha$ -M6P complex, with each protomer bound to one molecule of M6P. One eIF2B $\alpha$  protomer is colored teal and the second protomer is colored cyan. The  $\alpha$ -helical domain and the Rossmann fold-like domain are indicated. M6P is shown as space-filling spheres. **b** M6P recognition through H-bonds contributed by surrounding residues. M6P is shown as green sticks. The residues coordinating M6P are represented as cyan sticks, with H-bonds represented by dashed yellow lines.



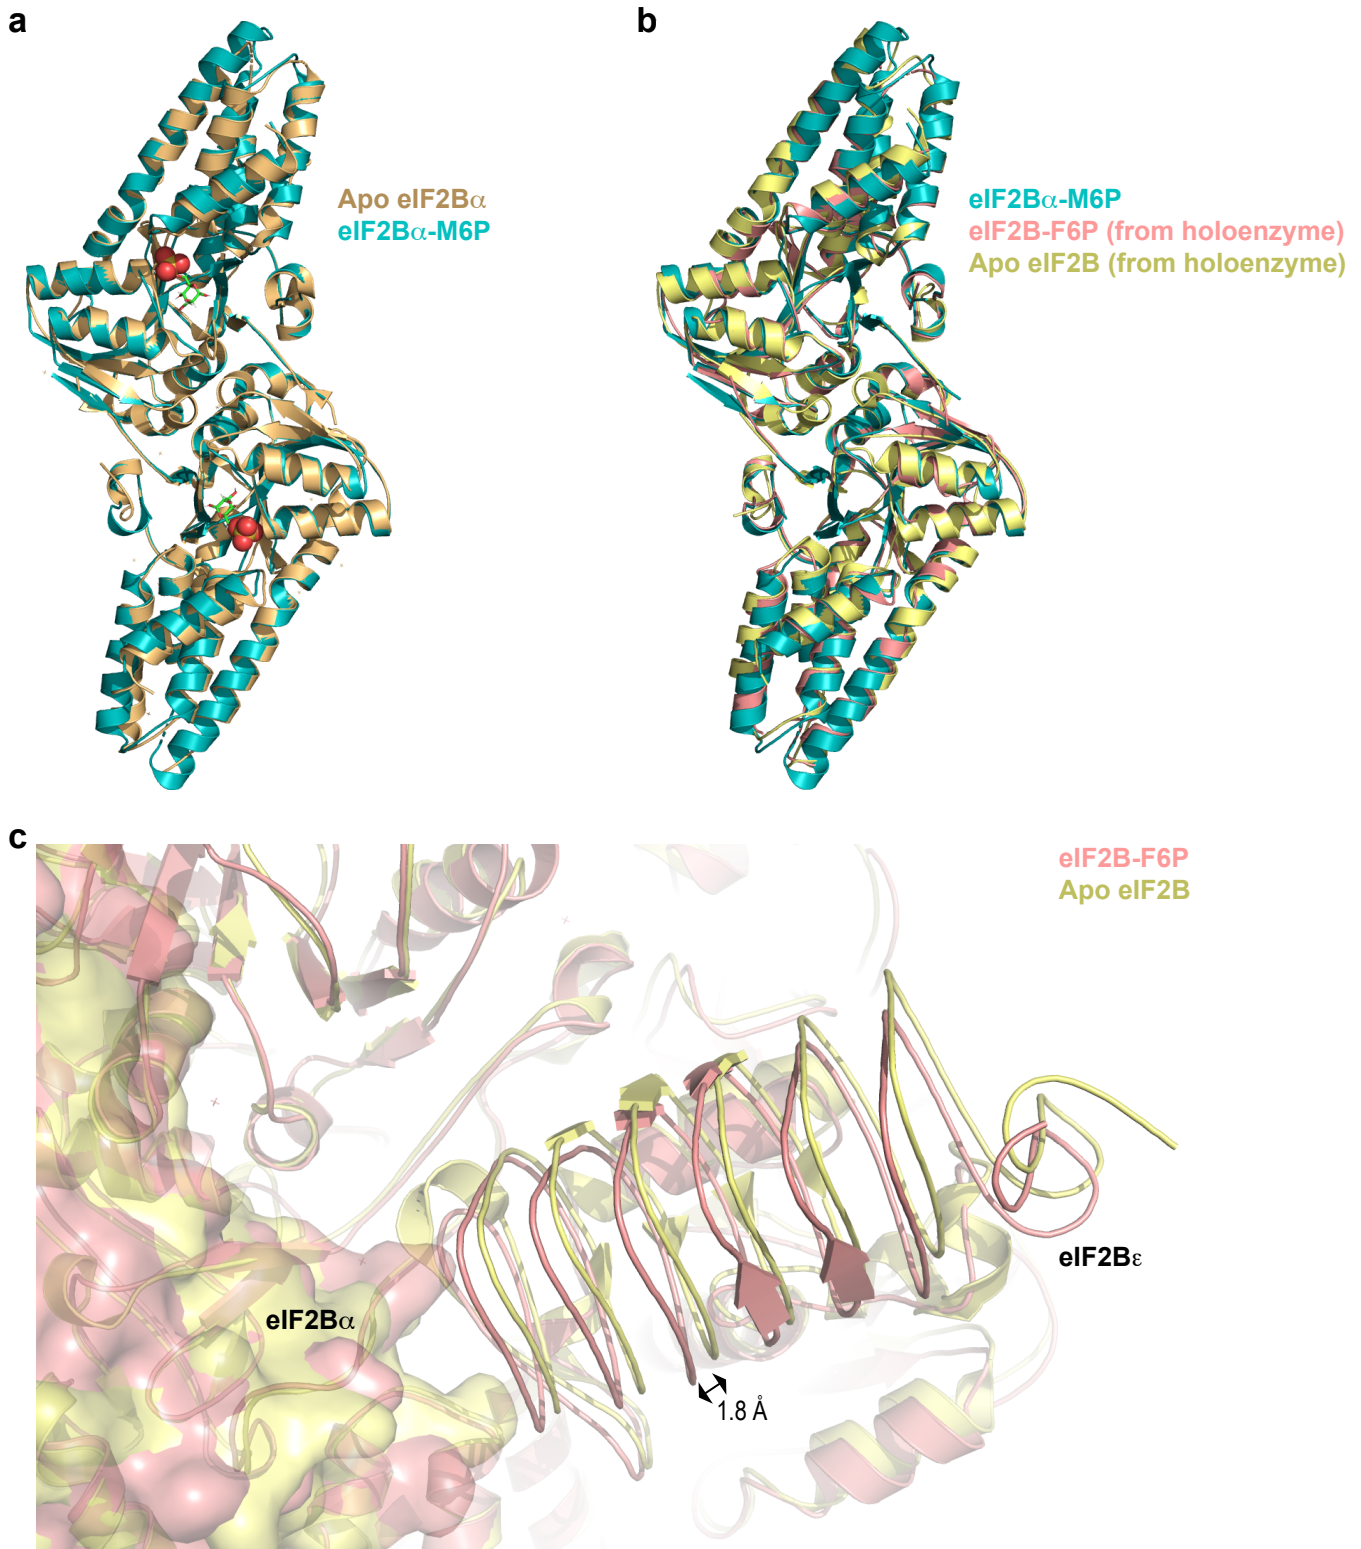

Supplementary Figure 7. **Superposition of sugar phosphate-bound eIF2B structures with apo structures.** **a** Apo eIF2B $\alpha$  (PDB 3ECS) aligned to our structure of M6P-bound eIF2B $\alpha$  (PDB 7KMA) with rmsd = 0.44 Å. M6P is shown in stick representation and SO<sub>4</sub> molecules occupying the sugar phosphate binding site in the apo structure are shown as spheres. **b** M6P-bound eIF2B $\alpha$  aligned to eIF2B $\alpha$  from the holoenzyme structures (our F6P-bound structure; PDB 7KMF and the apo holoenzyme; PDB 7D46) with rmsd < 0.9 Å. **c** Zoomed-in view of the  $\beta$ -sheet rich domain of one eIF2B $\epsilon$  subunit, showing an inward movement towards the eIF2B $\alpha$  subunit (shown in surface representation) in the F6P-bound structure.

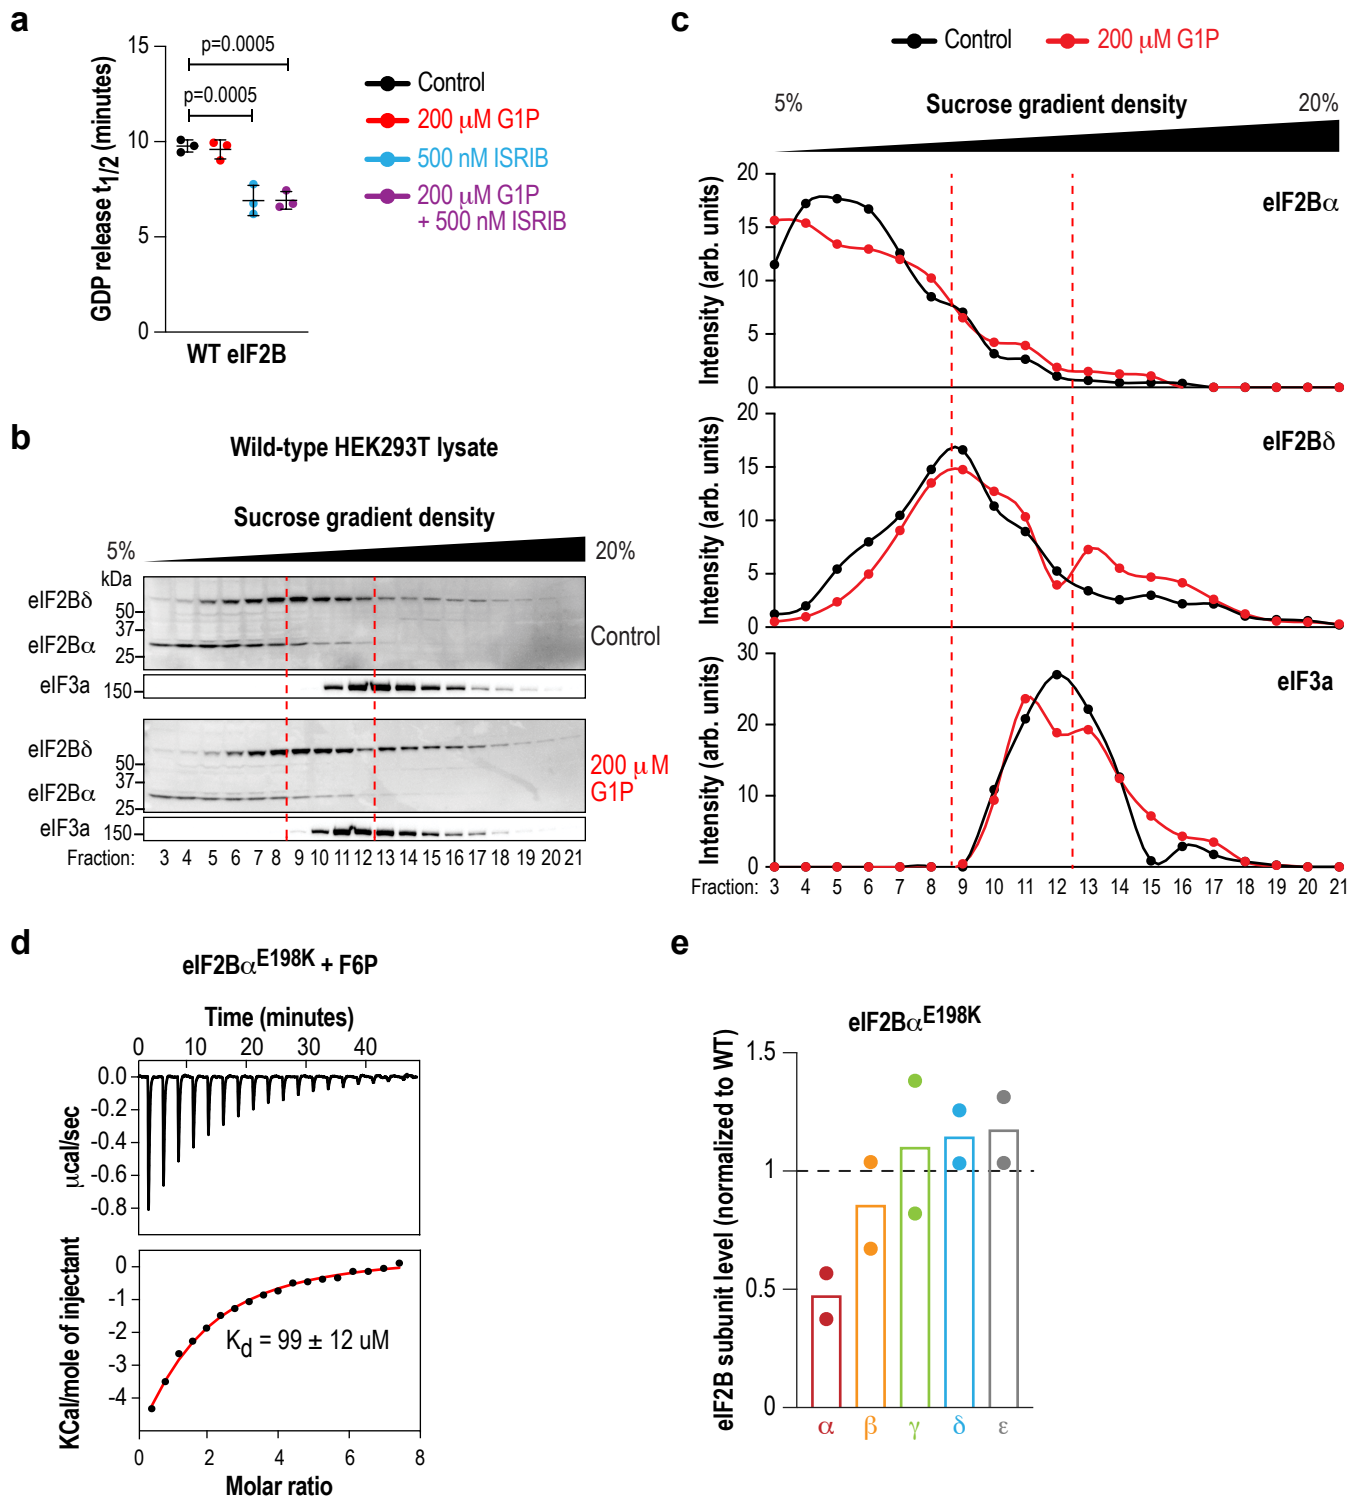

Supplementary Figure 8. **Sugar phosphate identity dictates its ability to enhance eIF2B decamer formation and activity.** **a** GDP release  $t_{1/2}$  in a GEF assay using recombinant wild-type eIF2B. Activity is stimulated by ISRIB (red), but not G1P (blue). Bars are mean  $\pm$  standard deviation of  $n=3$  independent experiments of 3 technical replicates each. Statistical significance was tested by one-way ANOVA with Dunnett's multiple testing correction. **b** eIF2B complex assembly from wild-type HEK293T lysate treated with G1P was monitored by sucrose gradient centrifugation. Fractions from the sucrose gradient were subjected to SDS-PAGE followed by immunoblotting with the indicated antibodies. eIF3a was used as an internal control. **c** Quantification of **b** normalized by total intensity of each subunit in its respective gradient. Data shown are representative of 2-3 replicates of each experiment. In **b** and **c**, dashed red lines demark the boundary of the decameric eIF2B peak. G1P did not promote eIF2B decamer formation. **d**  $K_d$  of the eIF2B $\alpha$ <sup>E198K</sup>-F6P interaction measured by ITC. The upper subpanel shows the baseline-subtracted thermogram. The bottom subpanel represents the binding isotherm, with the red line indicating the fit curve. **e** Antibody-based quantification of eIF2B subunits from HEK293T lysates of wild-type and eIF2B $\alpha$ <sup>E198K</sup> cells. For each subunit, the signal was normalized to wild-type subunit levels. Data from 2 biological replicates are shown.

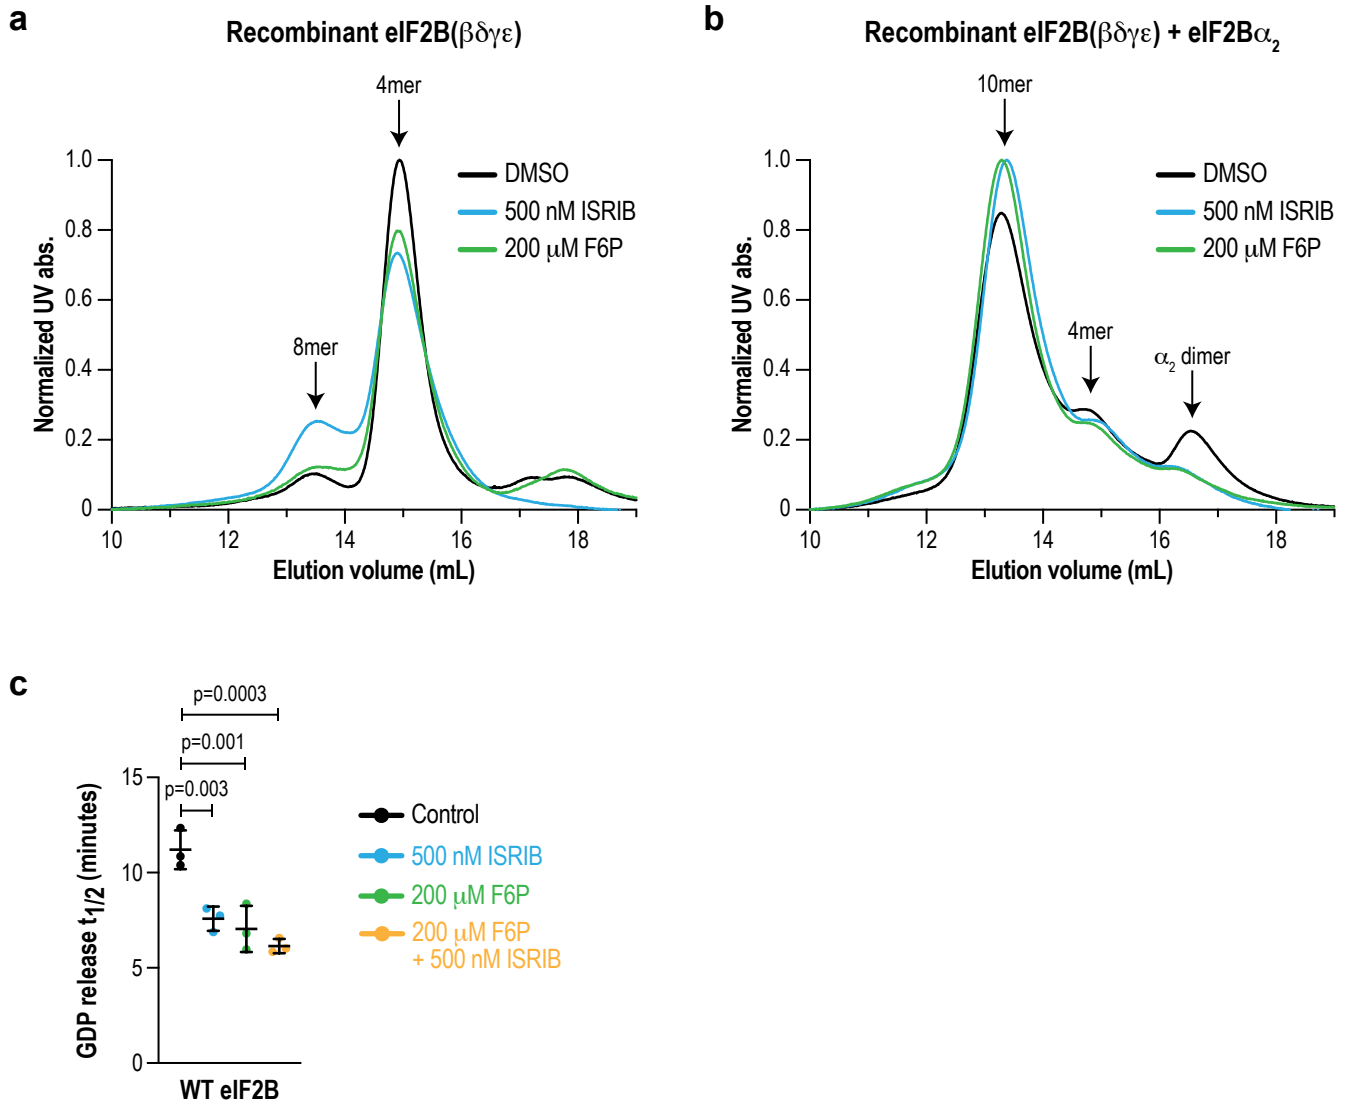

Supplementary Figure 9. **F6P only enhances eIF2B complex stability in the presence of eIF2B $\alpha_2$ , whereas ISRIB functions in the absence of eIF2B $\alpha_2$ .** **a** Size-exclusion chromatograms of purified recombinant eIF2B( $\beta\delta\gamma\epsilon$ ) in the absence or presence of ISRIB (blue) or F6P (green). The elution positions of the ( $\beta\delta\gamma\epsilon$ )<sub>2</sub> octamer and ( $\beta\delta\gamma\epsilon$ ) tetramer are indicated. **b** Size-exclusion chromatograms of purified recombinant eIF2B( $\beta\delta\gamma\epsilon$ ) + eIF2B $\alpha_2$  in the absence or presence of ISRIB or F6P. The elution positions of the ( $\alpha\beta\delta\gamma\epsilon$ )<sub>2</sub> decamer, ( $\beta\delta\gamma\epsilon$ ) tetramer and  $\alpha_2$  dimer are indicated. In **a** and **b**, traces are representative examples of at least 2 experiments. **c** GDP release  $t_{1/2}$  in a GEF assay using recombinant wild-type eIF2B. Activity is stimulated by ISRIB and F6P, but the combination of both (orange) is not additive. Bars are mean  $\pm$  standard deviation of  $n=3$  independent experiments of 3 technical replicates each. Statistical significance was tested by one-way ANOVA with Dunnett's multiple testing correction.

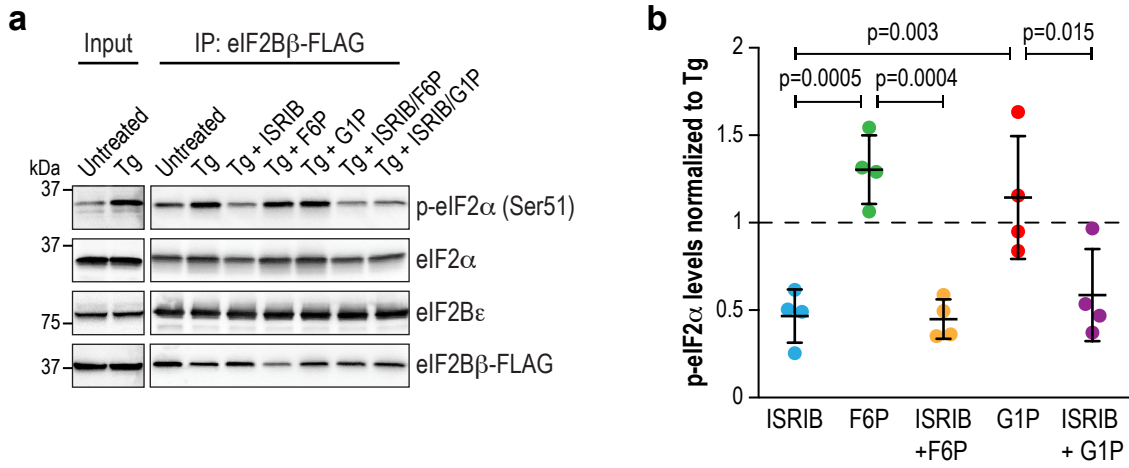

Supplementary Figure 10. **ISRIB, but not F6P, antagonizes p-eIF2 $\alpha$  binding to eIF2B.** **a** Co-immunoprecipitation of phospho-eIF2 $\alpha$  from HEK293T cells endogenously expressing FLAG-tagged eIF2B $\beta$  and stressed with thapsigargin (Tg). Ligand incubations were performed at 4°C for 2 hours. Immunoprecipitation was performed against the FLAG epitope. Western Blots of the indicated proteins are shown. **b** Quantification of co-immunoprecipitation experiment. Densitometric measurements were abundance-normalized to eIF2B $\beta$ -FLAG, then normalized again to the Tg condition. Each bar represents mean  $\pm$  standard deviation of  $n=4$  independent experiments. Statistical significance was tested by one-way ANOVA with Sidak's multiple testing correction.



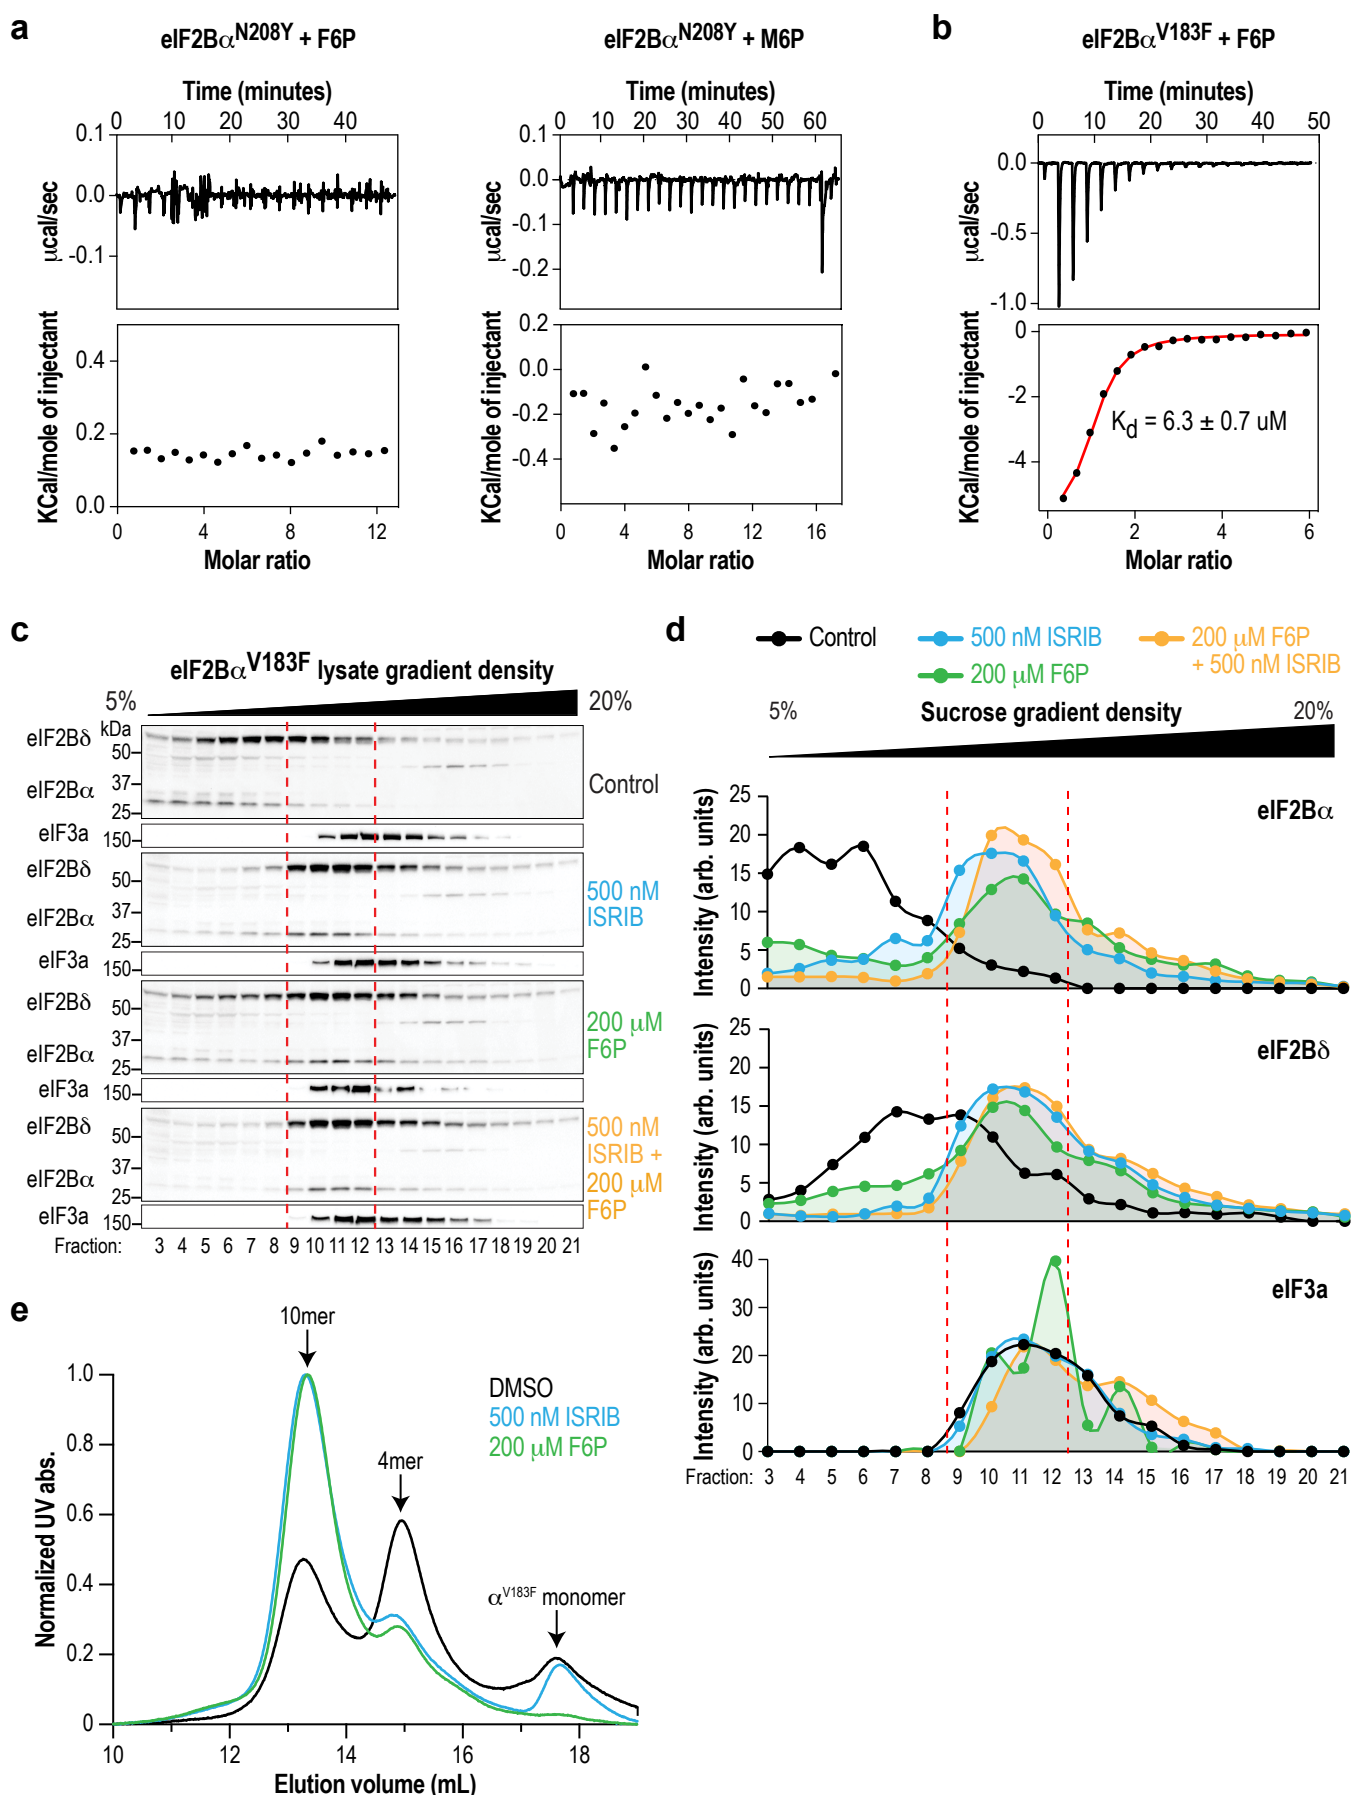

Supplementary Figure 11. **Sugar phosphate binding is abolished by the  $eIF2B\alpha^{N208Y}$  mutant but maintained in the  $eIF2B\alpha^{V183F}$  mutant.** **a**  $eIF2B\alpha^{N208Y}$  does not interact with F6P or M6P. **b**  $eIF2B\alpha^{V183F}$  interacts with F6P similar to wild-type  $eIF2B\alpha$ . In **a** and **b**, the upper subpanel shows the baseline-subtracted thermogram. The bottom subpanel represents the binding isotherm, with the red line indicating the fit curve, if available. **c** Sucrose gradient centrifugation of  $eIF2B\alpha^{V183F}$  HEK293T lysate treated with ISRIB (blue), F6P (green) or both (orange). Fractions from the sucrose gradient were subjected to SDS-PAGE followed by immunoblotting with the indicated antibodies.  $eIF3a$  was used as an internal control. **d** Quantification of **c** normalized by total intensity of each subunit in its respective gradient. Data shown are representative of 3 replicates of each experiment. In **c** and **d**, dashed red lines demarcate the boundary of the decameric  $eIF2B$  peak. **e** Size-exclusion chromatograms of purified recombinant  $eIF2B(\beta\delta\gamma\epsilon) + eIF2B\alpha^{V183F}$  in the absence or presence of ISRIB or F6P. The elution positions of the  $(\alpha\beta\delta\gamma\epsilon)_2$  decamer,  $(\beta\delta\gamma\epsilon)$  tetramer and  $\alpha^{V183F}$  monomer are indicated.

Supplementary Table 1. **Cryo-EM data collection, refinement and validation statistics**

|                                                  | eIF2B-F6P<br>(EMD-22924)<br>(PDB 7KMF) |
|--------------------------------------------------|----------------------------------------|
| <b>Data collection and processing</b>            |                                        |
| Magnification                                    | 130,000                                |
| Voltage (kV)                                     | 300                                    |
| Electron exposure (e-/Å <sup>2</sup> )           | 44.33                                  |
| Defocus range (µm)                               | -1.0 to -2.4                           |
| Pixel size (Å)                                   | 1.04                                   |
| Symmetry imposed                                 | C2                                     |
| Initial particle images (no.)                    | 736,044                                |
| Final particle images (no.)                      | 73,704                                 |
| FSC threshold                                    | 0.143                                  |
| Map resolution range (Å)                         | 2.9 – 6.0                              |
| <b>Refinement</b>                                |                                        |
| Initial model used (PDB code)                    | 6CAJ                                   |
| Model Resolution (Å)                             | 3.0                                    |
| FSC threshold                                    | 0.143                                  |
| Model resolution range (Å)                       | 2.9                                    |
| Map sharpening <i>B</i> factor (Å <sup>2</sup> ) | -106.6                                 |
| Model Composition                                |                                        |
| Non-hydrogen atoms                               | 22875                                  |
| Protein residues                                 | 3005                                   |
| Ligands                                          | 2                                      |
| <i>B</i> factors (Å <sup>2</sup> )               |                                        |
| Protein                                          | 104.02                                 |
| Ligand                                           | 82.94                                  |
| R.m.s. deviations                                |                                        |
| Bond lengths (Å)                                 | 0.009                                  |
| Bond angles (°)                                  | 1.066                                  |
| Validation                                       |                                        |
| MolProbity score                                 | 1.88                                   |
| Clashscore                                       | 7.69                                   |
| Poor rotamers (%)                                | 0.21                                   |
| Ramachandran plot                                |                                        |
| Favored (%)                                      | 92.76                                  |
| Allowed (%)                                      | 7.24                                   |
| Disallowed (%)                                   | 0                                      |

Supplementary Table 2. X-ray data collection and refinement statistics (molecular replacement)

|                                                      | eIF2B $\alpha$ -M6P<br>(PDB 7KMA) |
|------------------------------------------------------|-----------------------------------|
| <b>Data collection</b>                               |                                   |
| Space group                                          | P 1 21 1                          |
| Cell dimensions                                      |                                   |
| <i>a</i> , <i>b</i> , <i>c</i> (Å)                   | 71.2, 155.5, 140.1                |
| $\alpha$ , $\beta$ , $\gamma$ (°)                    | 90, 103.89, 90                    |
| Resolution (Å)                                       | 55.61 – 2.7 (2.797 – 2.70)        |
| <i>R</i> <sub>sym</sub> or <i>R</i> <sub>merge</sub> | 0.0364 (0.3218)                   |
| <i>I</i> / $\sigma$ <i>I</i>                         | 13.35 (2.51)                      |
| Completeness (%)                                     | 93.72 (99.64)                     |
| Redundancy                                           | 1.9 (1.9)                         |
| <b>Refinement</b>                                    |                                   |
| Resolution (Å)                                       | 2.7                               |
| No. reflections                                      | 76117 (8075)                      |
| <i>R</i> <sub>work</sub> / <i>R</i> <sub>free</sub>  | 0.1907/0.2381                     |
| No. atoms                                            |                                   |
| Protein                                              | 16887                             |
| Ligand/ion                                           | 132                               |
| Water                                                | 153                               |
| <i>B</i> -factors                                    |                                   |
| Protein                                              | 68.36                             |
| Ligand/ion                                           | 55.65                             |
| Water                                                | 55.45                             |
| R.m.s. deviations                                    |                                   |
| Bond lengths (Å)                                     | 0.008                             |
| Bond angles (°)                                      | 0.93                              |

\*Values in parentheses are for highest-resolution shell.
